# Supplementary material for: NMR-Based Structural Insights on Folic Acid and Its Interactions with Copper(II) Ions
Source: MDPI journal article supplement (doi:10.3390/inorganics12090248), 2024-09-12
Supplement: s1 [file inorganics-3150190-supplementary.pdf › inorganics-3150190-supplementary.pdf]

## Supplementary Materials

### **NMR-Based Structural Insights on Folic Acid and its Interactions with Copper(II) ions**

Arian Kola and Daniela Valensin\*

Department of Biotechnology, Chemistry and Pharmacy, University of Siena, Via Aldo Moro 2, 53100 Siena, Italy; [arian.kola@unisi.it](mailto:arian.kola@unisi.it), [daniela.valensin@unisi.it](mailto:daniela.valensin@unisi.it)

\*Correspondence: [daniela.valensin@unisi.it](mailto:daniela.valensin@unisi.it); Tel.: +39-0577-232428

## Table S1

[illegible]

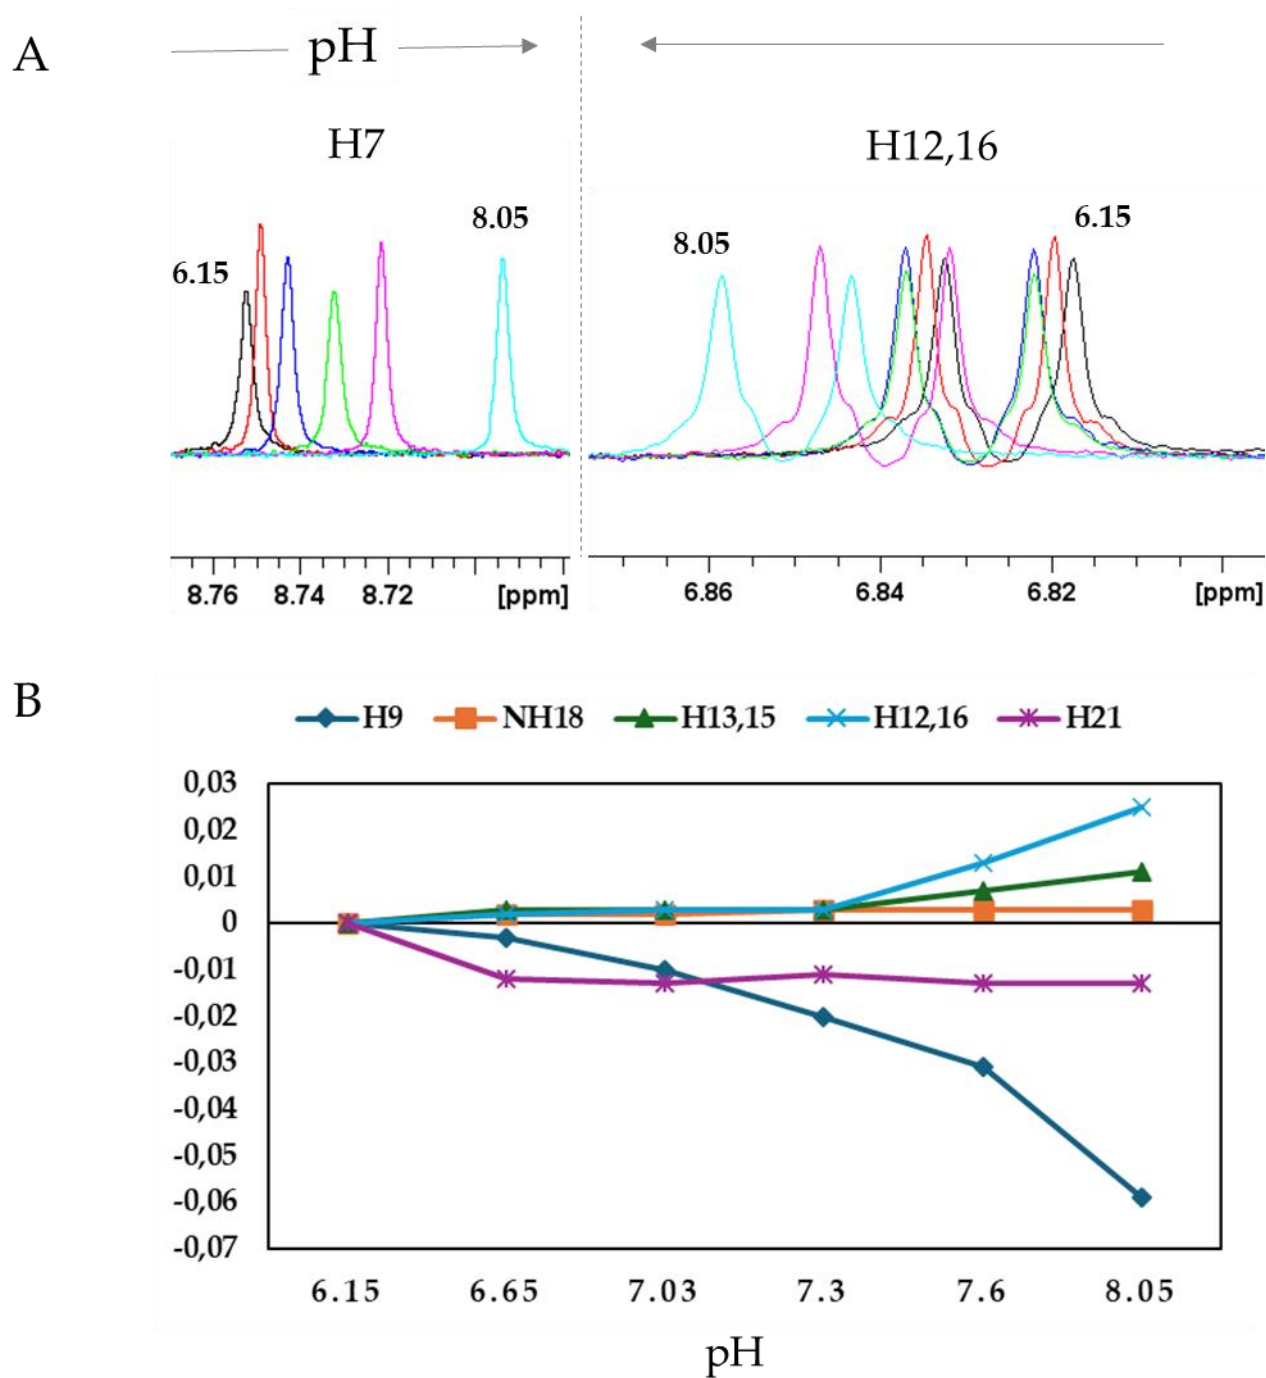

Figure S1. pH dependence of proton chemical shift of FA 0.5 mM: A. Superimposition of  $^1\text{H}$  NMR signals of H7 and H12,16 at different pH values starting from 6.15 to 8.05; B. Chemical shift variations of FA protons at different pH values.

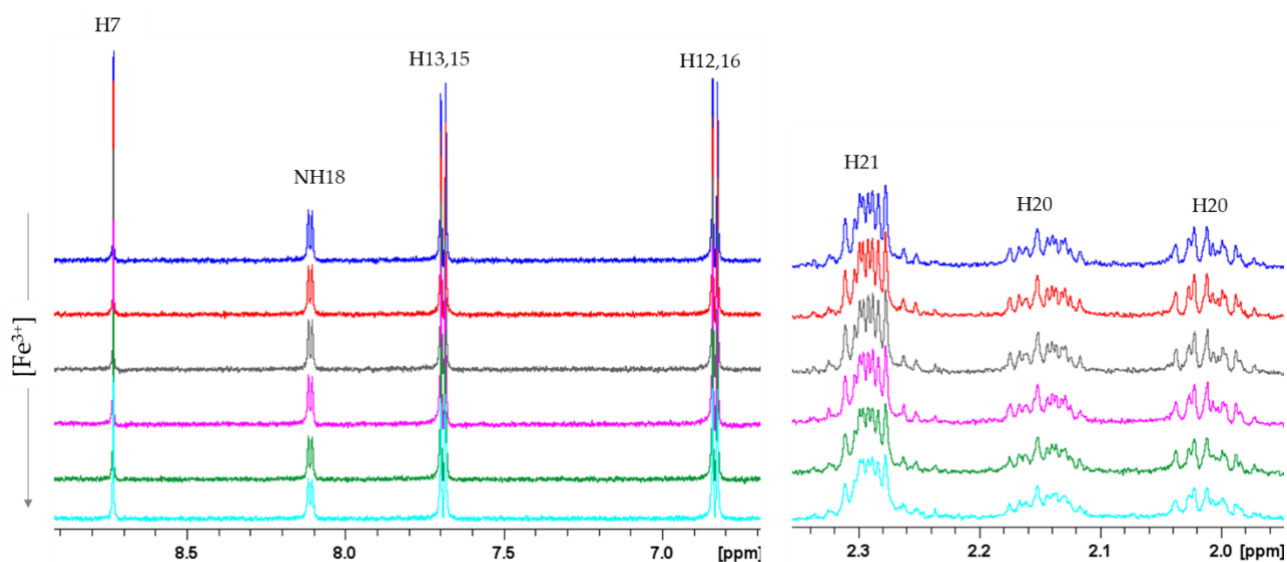

Figure S2.  $^1\text{H}$  NMR spectra of FA 0.5 mM in phosphate buffer 20 mM (pH 7.35) and  $T=298$  K in absence and in presence of  $\text{Fe}^{3+}$  ions.  $\text{Fe}^{3+} = 0$  eqs (blue);  $\text{Fe}^{3+} = 0.02$  eqs (red);  $\text{Fe}^{3+} = 0.04$  eqs (gray);  $\text{Fe}^{3+} = 0.08$  eqs (magenta);  $\text{Fe}^{3+} = 0.12$  eqs (green);  $\text{Fe}^{3+} = 0.20$  eqs (light blue).

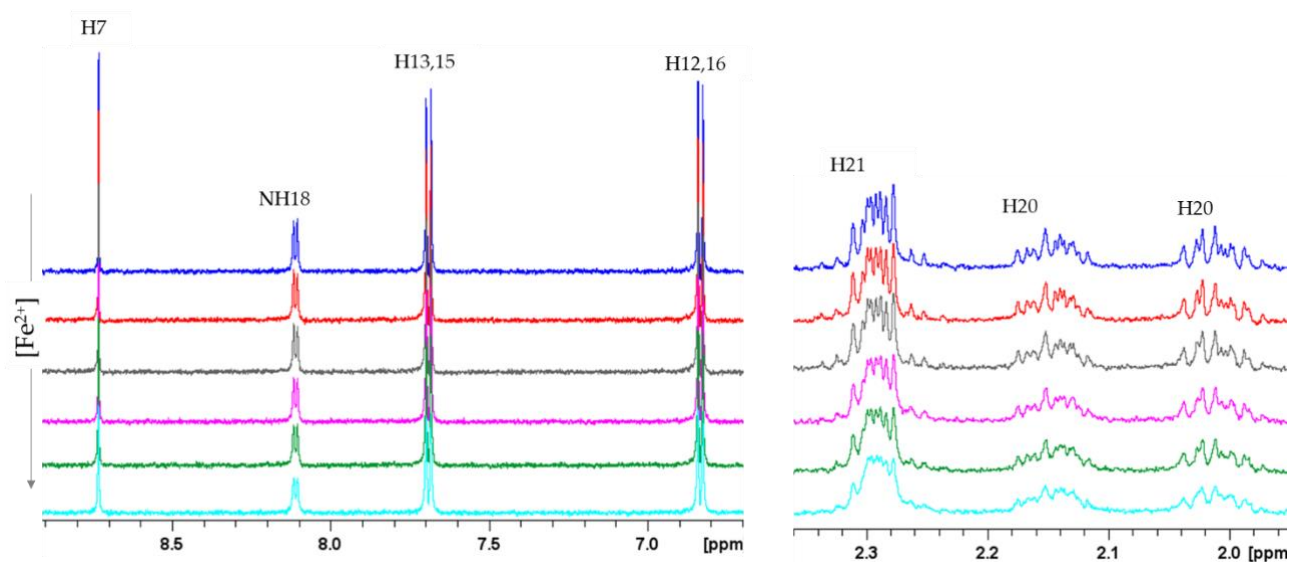

Figure S3.  $^1\text{H}$  NMR spectra of FA 0.5 mM in phosphate buffer 20 mM (pH 7.35) and  $T=298$  K in absence and in presence of  $\text{Fe}^{2+}$  ions.  $\text{Fe}^{2+} = 0$  eqs (blue);  $\text{Fe}^{2+} = 0.02$  eqs (red);  $\text{Fe}^{2+} = 0.04$  eqs (gray);  $\text{Fe}^{2+} = 0.08$  eqs (magenta);  $\text{Fe}^{2+} = 0.12$  eqs (green);  $\text{Fe}^{2+} = 0.20$  eqs (light blue).

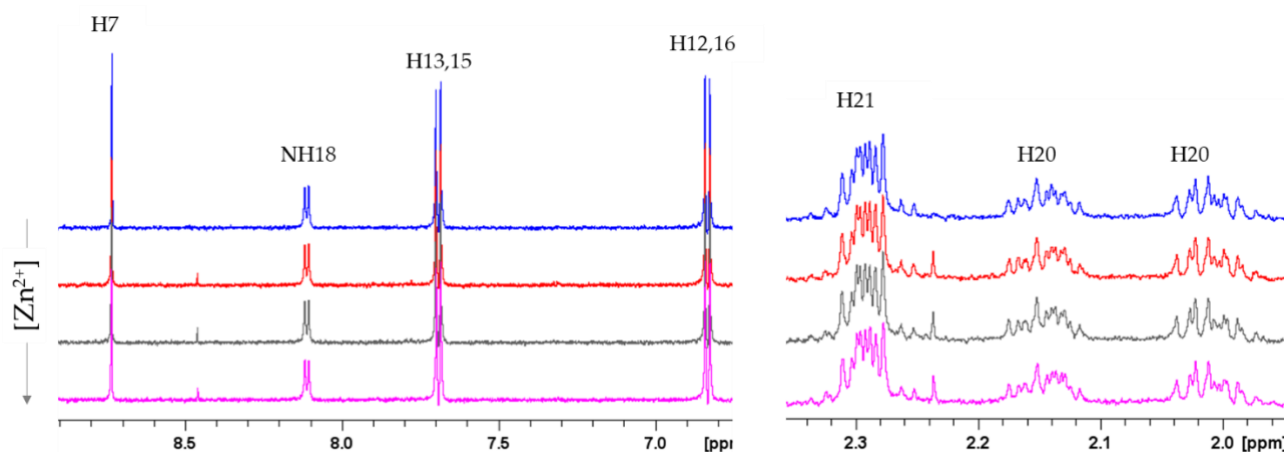

Figure S4.  $^1\text{H}$  NMR spectra of FA 0.5 mM in phosphate buffer 20 mM (pH 7.35) and  $T=298$  K in absence and in presence of  $\text{Zn}^{2+}$  ions.  $\text{Zn}^{2+} = 0$  eqs (blue);  $\text{Zn}^{2+} = 0.3$  eqs (red);  $\text{Zn}^{2+} = 0.6$  eqs (gray);  $\text{Zn}^{2+} = 0.9$  eqs (magenta).
